# Supplementary material
Source: publisher site journal article supplement (https://www.dovepress.com/article/547285)
Supplement: Supplementary file 1 [file Appendix1_0903.docx]

**Appendix 1**

Psychological Empowerment1

| PE1 | The work I do is very important to me |
| --- | --- |
| PE2 | My job activities are personally meaningful to me |
| PE3 | The work I do is meaningful to me |
| PE4 | I am confident about my ability to do my job |
| PE5 | I am self-assured about my capabilities to perform my work activities |
| PE6 | I have mastered the skills necessary for my job |
| PE7 | I have significant autonomy in determining how I do my job |
| PE8 | I can decide on my own how to go about doing my work |
| PE9 | I have considerable opportunity for independence and freedom in how I do my job |
| PE10 | My impact on what happens in this unit is large |
| PE11 | I have a great deal of control over what happens in this unit |
| PE12 | I have significant influence over what happens in this unit |

Job Satisfaction2

| JS1 | In general, I don’t like my job |
| --- | --- |
| JS2 | In general I like working here |
| JS3 | I often think of quitting the organisation |
| JS4 | I think of searching for another position with another organisation |
| JS5 | I often think of leaving the organisation within the next year |
| JS6 | All in all, I am satisfied with my job |
| JS7 | I would recommend my organisation as a good place to work |

Leadership (staff assessing immediate managers)2

| Lead1 | is focused on doing the right thing as well as on getting results |
| --- | --- |
| Lead2 | encourages employees to look at problems and come up with their own solutions and suggestions |
| Lead3 | listens to the concerns of employees |
| Lead4 | expresses their confidence that the unit will achieve its goals |
| Lead5 | encourages employees to express their ideas and opinions |
| Lead6 | provides employees with continuous encouragement |
| Lead7 | provides me with motivation |
| Lead8 | deserves trust, can be believed and relied upon for his/her word |
| Lead9 | is open in his or her communication with subordinates |
| Lead10 | acts according to what is right or fair |
| Lead11 | makes sure that his/her actions are always ethical |
| Lead12 | speaks and acts truthfully |
| Lead13 | would be personally inclined to use his/her power to help me solve problems in my work |
| Lead14 | would bail me out even at his or her own expense, when I really need it |
| Lead15 | understands my problems and needs |
| Lead16 | recognises my potential |
| Lead17 | has enough confidence in me that he/she would defend and justify my decisions if I were not present |
| Lead18 | I usually know where I stand with my immediate manager |
| Lead19 | I have excellent working relationship with my immediate manager |

MCAP Leadership Competency 5 – Leading people and organisations3,4

C5.1 Develop and/or implement a shared vision to achieve organisational goals

C5.2 Manage with reference to the broader organisational context

C5.3 Engage effectively in organisational decision-making

C5.4 Inform and educate influential decision makers

C5.5 Recognise and balance personal, professional and organisational values and priorities.

C5.6 Lead, develop and evaluate performance to build an effective team

C5.7 Empower others to achieve goals

C5.8 Adapt leadership style to suit the situation

C5.9 Establish and maintain a personal and professional support network

C5.10 Persevere to achieve goals

C5.11 Demonstrate confidence, energy, commitment and enthusiasm

C5.12 Encourage ideas and identifies opportunities

C5.13 Remain calm whilst under pressure

**Appendix References**

1. Spreitzer GM. Psychological empowerment in the workplace: Dimensions, measurement, and validation. *Academy Manag J*. 1995;38(5):1442-65.

2. Bartram T, Karimi L, Leggat SG, Stanton P. Social identification: Linking high performance work systems, psychological empowerment and patient care. *Int J Human Res Manag*. 2014;25(17):2401-19.'doi:10.1080/09585192.2014.880152.

3. Howard PF, Liang Z, Leggat S, Karimi L. Validation of a management competency assessment tool for health service managers. *J Health Organ Manag*. 2018;32(1):113-34.'doi:10.1108/JHOM-08-2017-0223.

4. Liang Z, Howard PF, Leggat S, Bartram T. Development and validation of health service management competencies. *J Health Organ Manag*. 2018;32(2):157-75.'doi:DOI 10.1108/JHOM-06-2017-0120.
